# Supplementary figures and images for: Native Arbuscular Mycorrhizal Fungi Characterization from Saline Lands in Arid Oases, Northwest China
Source: MDPI journal article supplement (doi:10.3390/jof6020080), 2020-06-06

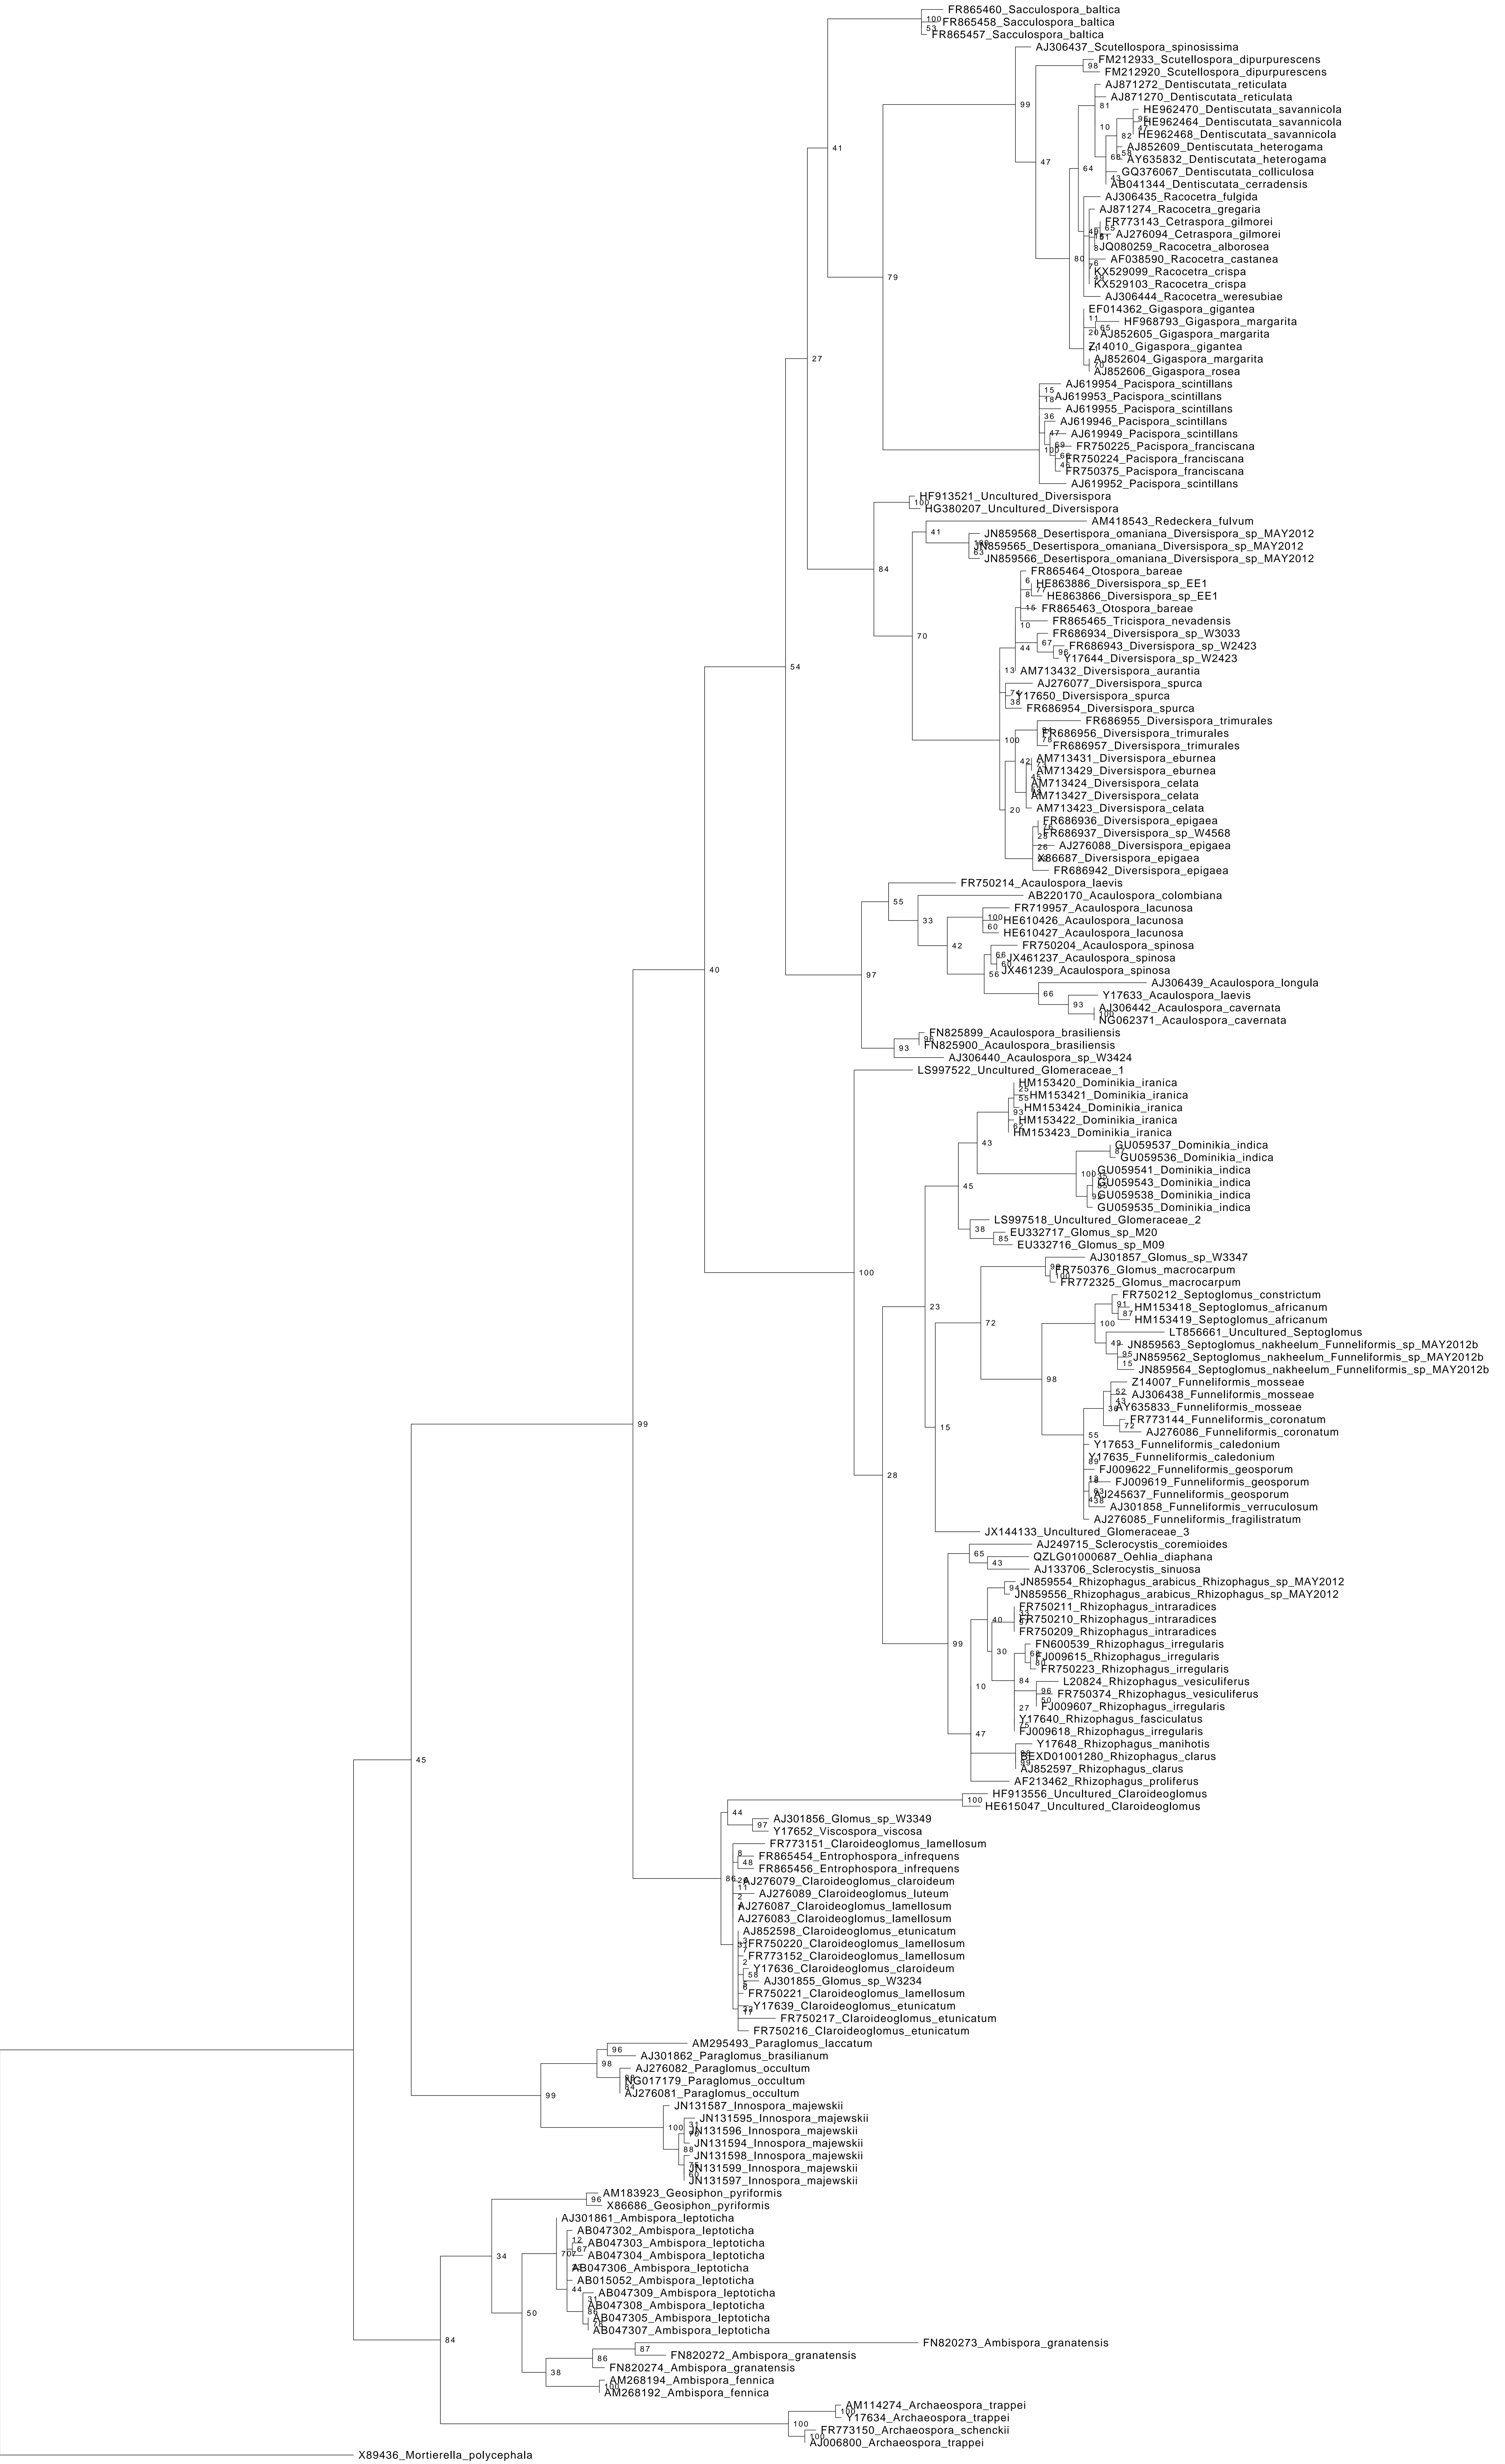

Supplement: s1 [file s1]
